# Supplementary material
Source: Springer Nature journal article supplement (https://www.springermedizin.de/resource/supplementary/12968_2010_976_MOESM5_ESM.pdf/9580080)

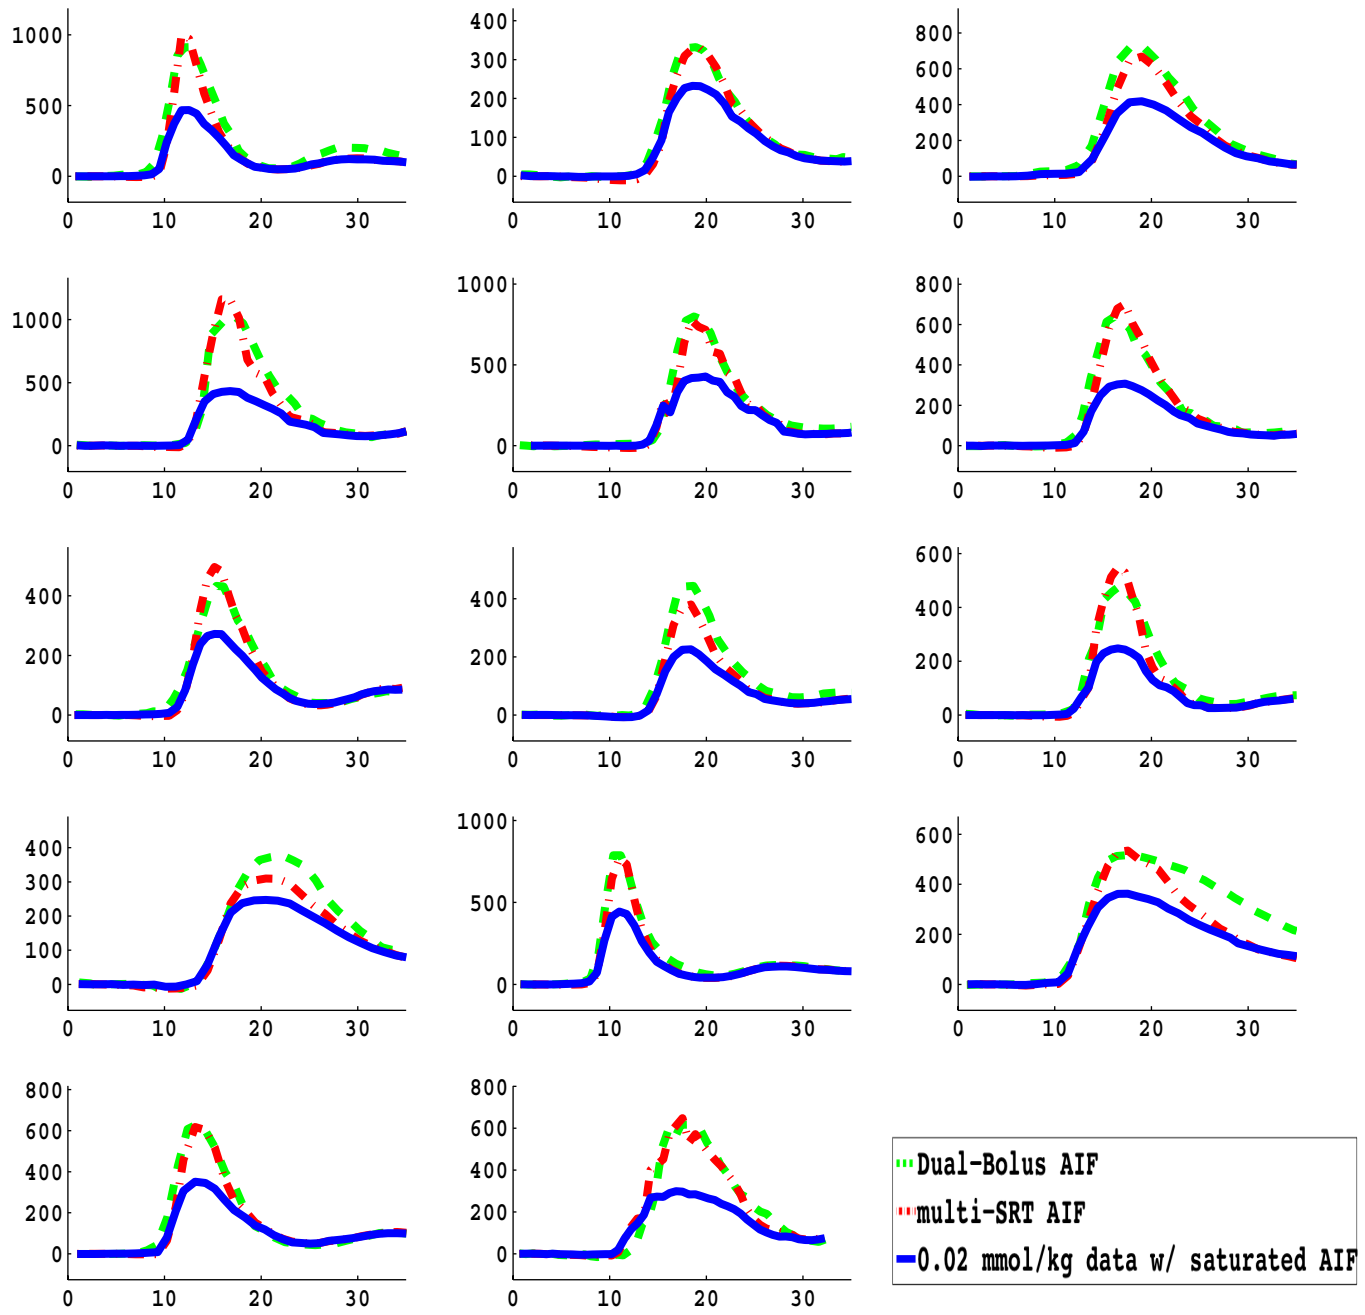

Supplement: MOESM5 [file 9580080]
